# Supplementary material
Source: PubMed Central journal article supplement (PMC3354001)
Supplement: NIHMS374781-supplement-01.pdf [file NIHMS374781-supplement-01.pdf]

## T lymphocytes and Vascular Inflammation Contribute to Stress-Dependent Hypertension

### *Supplemental Information*

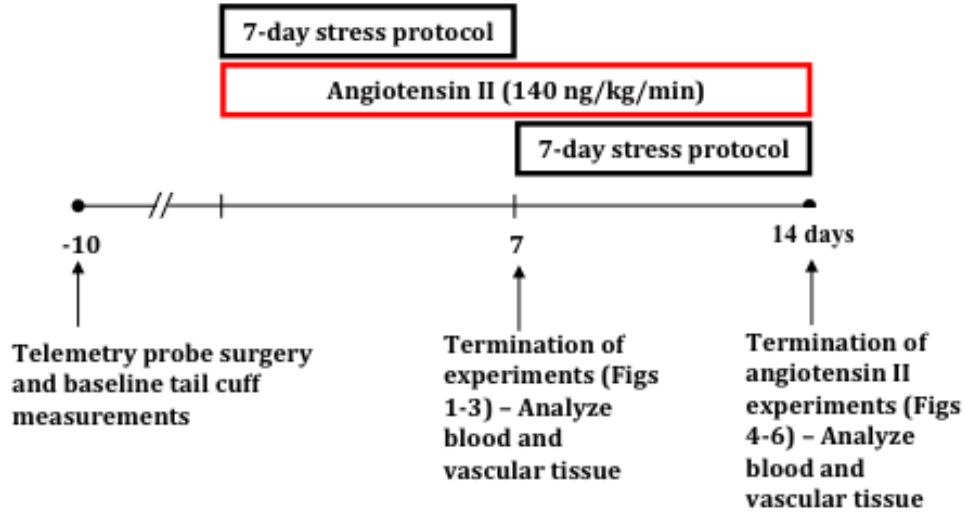

**Figure S1.** Experimental Design

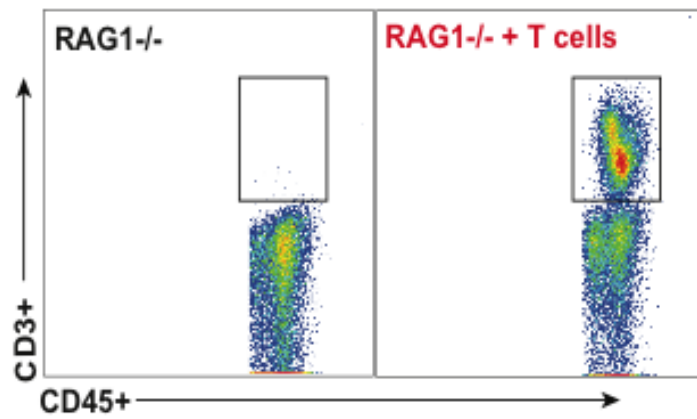

**Figure S2.** Flow cytometry plot demonstrating successful reconstitution of CD3<sup>+</sup> cells into RAG1<sup>-/-</sup> mice.
